# Supplementary material for: Spin-transition behaviour in chains of FeII bridged by 4-substituted 1,2,4-triazoles carrying alkyl tails
Source: Royal Society of Chemistry journal article supplement (doi:10.1039/b007094g), 2001-01-01
Supplement: b007094g.doc [file b007094g.doc]

**Elemental analyses found (calculated) for :**

4-Methyl-1,2,4-triazole (mtrz) : C, 43.5 (43.4), H, 5.9 (6.0), N, 51.1 (50.6)

4-Ethyl-1,2,4-triazole (ettrz) : 49.4 (49.5), H, 7.1 (7.3), N, 44.2 (43.3)

4-Propyl-1,2,4-triazole (ptrz) : C, 54.0 (54.0), H, 8.0 (8.2), N, 38.0 (37.8)

4-Buty-1,2,4-triazole (btrz) : C, 57.8 (57.6), H, 8.5 (8.8), N, 33.7 (33.6)

4-Amyl-1,2,4-triazole (amtrz) : C 60.4 (60.4), H, 9.3 (9.4), 30.1 (30.2)

4-Hexyl-1,2,4-triazole (htrz) : C, 62.5 (62.7), H, 9.8 (9.9), N, 27.5 (27.4)

4-Heptyl-1,2,4-triazole (hptrz) : C, 64.3 (64.6), H, 10.1 (10.2), N, 25.3 (25.1)

4-Octyl-1,2,4-triazole (otrz) : C, 64.7 (64.8), H, 12.4(12.5), N, 22.9 (22.7)

4-Tridecyl-1,2,4-triazole (tdtrz) : C, 71.4 (71.7), H, 11.6 (11.6). N. 17.0 (16.7)

4-Hexadecyl-1,2,4-triazole (hdtrz) : C, 72.6 (72.5), H, 12.0 (12.5), N, 15.1 (14.9)

4-Stearyl-1,2,4-triazole (strz) : C, 73.7 (73.7), H, 12.8 (12.7), 13.8 (13.8)

[Fe(mtrz)3](BF4)2•0.5 H2O : C, 22.0 (22.2), H, 3.4 (3.3), N, 26.0 (25.8)

[Fe(mtrz)3](ClO4)2•0.5 H2O : C, 21.1 (21.5), H, 3.2 (3.0), N, 25.3 (25.0)

[Fe(ettrz)3](BF4)2•3 H2O : C, 25.3 (25.1), H, 4.4 (4.7), N, 21.9 (21.9)

[Fe(ettrz)3](ClO4)2•2 H2O : C, 24.5 (24.7), H, 4.1 (4.3), N, 21.6 (21.6)

[Fe(ptrz)3](BF4)2•3 H2O : C, 30.9 (31.9), H, 5.0 (5.4), N, 20.4 (20.4)

[Fe(ptrz)3](CF3SO3)2•2 H2O : C, 27.4 (28.2), H, 3.9 (4.3), N, 16.9 (17.4), 8.8 (8.2)

[Fe(btrz)3](BF4)2•H2O : C, 34.8 (34.7), H, 5.7 (5.7), N, 20.2 (20.2)

[Fe(btrz)3](C7H7SO3)2•2 H2O : C, 47.8 (47.5), H, 6.2 (6.4), N, 15.7 (15.6), S, 7.7 (7.1)

[Fe(btrz)3](CF3SO3)2•2 H2O : C, 30.4 (30.9), H, 6.4 (6.3), N, 16.7 (16.2), S, 8.1 (8.2)

[Fe(btrz)3](ClO4)2•2 H2O : C, 32.3 (32.4), H, 5.2 (5.6), N, 18.9 (18.9)

[Fe(amtrz)3](CF3SO3)2•2 H2O : C, 35.9 (34.2), H, 5.10 (5.4), N, 15.3 (15.6), S, 7.2 (7.8)

[Fe(amtrz)3](BF4)2•2 H2O : C, 36.7 (36.9), H, 5.7 (6.3), N, 18.6 (18.5)

[Fe(amtrz)3](C7H7SO3)2•2 H2O : C, 49.1 (49.3), H, 6.7 (6.7), N, 15.0 (14.8), S, 7.3 (7.5)

[Fe(amtrz)3](ClO4)2•2 H2O : C, 35.4 (35.6), H, 6.0 (6.1), N, 17.9 (17.8)

[Fe(htrz)3](BF4)2•2 H2O : C, 39.6 (39.8), H, 6.7 (6.8), N, 17.4 (17.4)

[Fe(htrz)3](C7H7SO3)2•2 H2O : C, 51.5 (51.6), H, 6.9 (7.1), N, 14.3 (14.3)

[Fe(htrz)3](ClO4)2•3 H2O : C, 37.0 (36.9), H, 8.2 (8.1), N, 16.5 (16.1)

[Fe(htrz)3](CF3SO3)2•2 H2O : C, 36.0 (36.2), H, 6.9 (7.1), N, 14.7 (14.6)

[Fe(hptrz)3](C7H7SO3)2•2 H2O : C, 52.0 (51.9), H, 8.4 (8.6), N, 13.8 (13.3), S, 6.9 (6.8)

[Fe(hptrz)3](BF4)2•2 H2O : C, 42.0 (41.6), H, 8.7 (8.7), N, 16.5 (16.2)

[Fe(hptrz)3](CF3SO3)2•2 H2O : C, 38.4 (38.5), H, 7.2 (7.5), N, 15.0 (13.9), S, 6.0 (7.1)

[Fe(hptrz)3](ClO4)2•2 H2O : C, 40.4 (40.3), H, 8.2 (8.4), N, 15.6 (15.7)

[Fe(otrz)3](C7H7SO3)2•2 H2O : C, 53.9 (54.0), H, 7.5 (7.7), N, 12.8 (12.9), S, 6.5 (6.5)

[Fe(otrz)3](ClO4)2•3 H2O : C, 42.3 (41.7), H, 8.4 (8.7), N, 15.1 (14.6)

[Fe(otrz)3](BF4)2•2 H2O : C, 43.4 (43.9), H, 8.5 (8.9), N, 15.2 (15.3)

[Fe(otrz)3](CF3SO3)2•2 H2O : C, 40.4(40.6), H, 7.5 (7.8), N, 13.5 (13.3)

[Fe(tdtrz)3](C7H7SO3)2•2 H2O : C, 59.7 (59.6), H, 8.0 (8.9), N, 11.5 (10.6), S, 5.1 (5.4)

[Fe(tdtrz)3](BF4)2•2 H2O : C, 53.5 (53.0), H, 8.3 (9.0), N, 13.3 (12.4)

[Fe(tdtrz)3](ClO4)2•2 H2O : C, 51.6 (51.7), H, 7.7 (8.8), N, 13.1 (12.0)

[Fe(tdtrz)3](CF3SO3)2•2 H2O : C, 49,3 (49.3), H, 7.4 (8.0), N, 11.8 (11.0), S, 5.4 (5.6)

[Fe(hdtrz)3](C7H7SO3)2•2 H2O : C, 64.0 (62.1), H, 9.1 (9.4), N, 9.4 (9.6), S, 4.8 (4.9)

[Fe(hdtrz)3](BF4)2•2 H2O : C, 56.2 (56.6), H, 9.8 (9.6), N, 10.9 (11.0)

[Fe(hdtrz)3](ClO4)2•2 H2O : C, 55.4 (55.3), H, 9.2 (9.4), N, 10.7 (10.8)

[Fe(hdtrz)3](CF3SO3)2•2 H2O : C, 52.7 (52.9), H, 8.1 (8.6), N, 9.8 (9.9), S, 5.1 (5.0)

[Fe(strz)3](C7H7SO3)2•2 H2O : C, 63.0 (63.5), H, 9.2 (9.7), N, 9.0 (9.0), S, 4.7 (4.6)

[Fe(strz)3](ClO4)2•3 H2O : C, 57.2 (57.4), H, 9.5 (9.7), N, 10.0 (10.4)

[Fe(strz)3](CF3SO3)2•2 H2O : C, 54.8 (55.0), H, 8.7 (9.0), N, 9.2 (9.3), S, 4.5 (4.7)

[Fe(strz)3](BF4)2•2 H2O : C, 58.4 (58.6), H, 9.9 (9.9), N, 10.1 (10.2)
